# Supplementary material for: Decreased Prosaposin and Progranulin in the Cingulate Cortex Are Associated with Schizophrenia Pathophysiology
Source: MDPI journal article supplement (doi:10.3390/ijms231912056), 2022-10-10
Supplement: s1 [file s1]

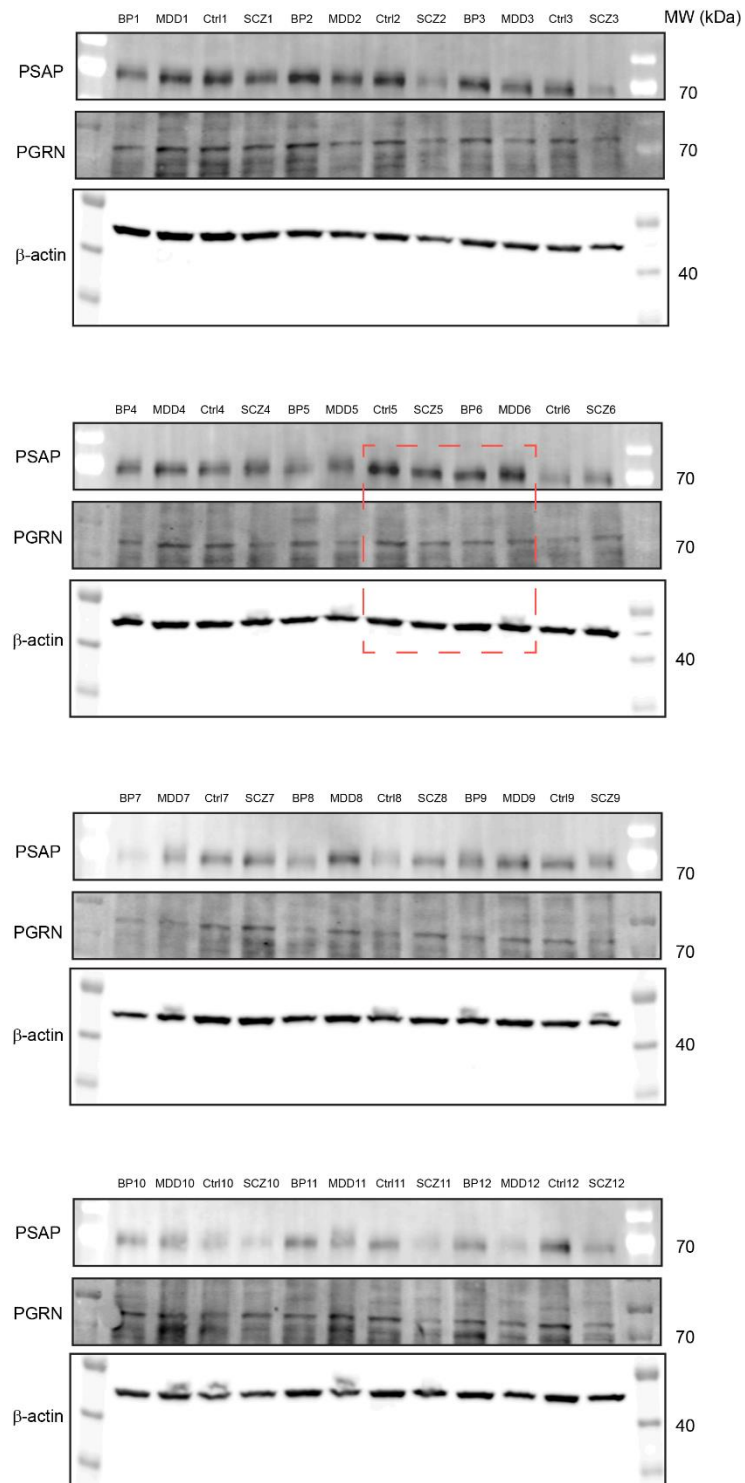

**Supplementary Figure S1.** Uncropped original blots for Figure 1. Red box indicates representative bands shown in Figure 1. Ctrl, healthy control; SCZ, schizophrenia; BP, bipolar disorders; MDD, major depressive disorders. MW, molecular weight.
